# Supplementary material
Source: HighWire-hosted journal article supplement (http://dmd.aspetjournals.org/highwire/filestream/79758/field_highwire_adjunct_files/3/1087_supp_fig4.pdf)
Supplement: 1087_supp_fig4.pdf [file 1087_supp_fig4.pdf]

# Metabolic disposition of triazolam and clobazam in humanized CYP3A mice with a double knockout background of mouse *Cyp2c* and *Cyp3a* genes

Kaoru Kobayashi, Genki Minegishi, Nina Kuriyama, Atsushi Miyajima, Satoshi Abe, Kanako Kazuki, Yasuhiro Kazuki

Drug Metabolism and Disposition

Manuscript Number: DMD-AR-2022-001087

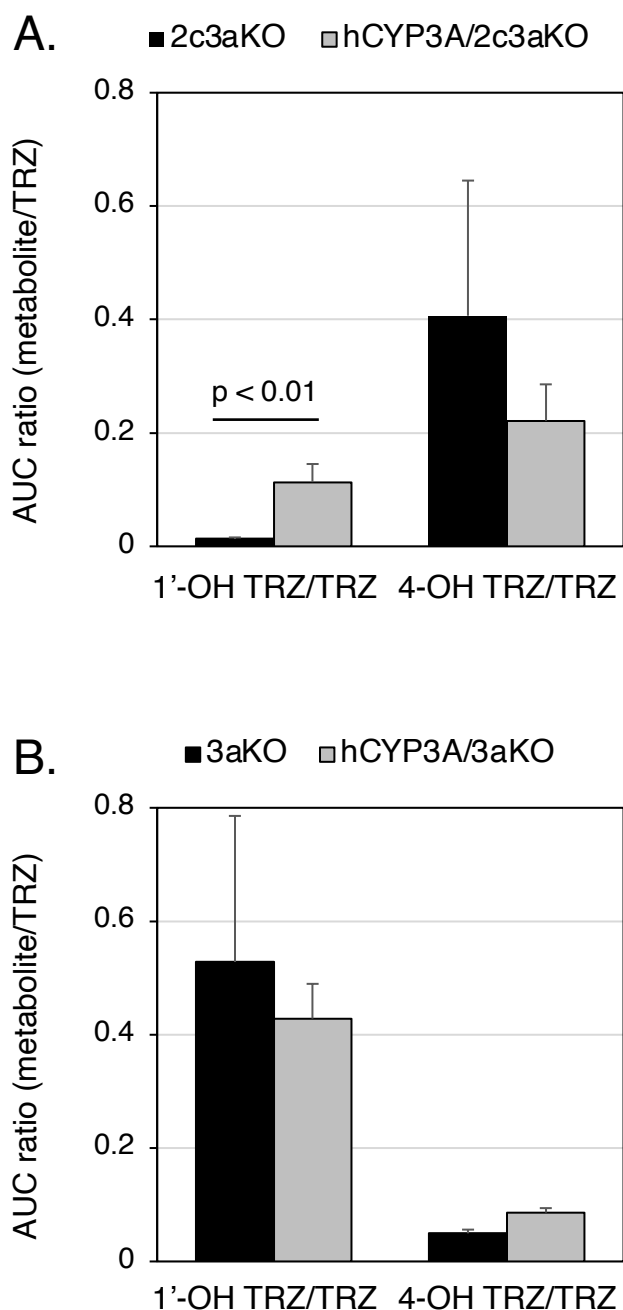

**Supplemental Fig. 4 AUC ratios (metabolite/TRZ) in 2c3aKO, hCYP3A/2c3aKO, 3aKO and hCYP3A/3aKO mice.**

(A) AUC ratios in 2c3aKO and hCYP3A/2c3aKO mice were cited from Table 2. (B) AUC ratios in 3aKO and hCYP3A/3aKO mice were cited from supplemental Table 1. Comparison of the two groups was made with Welch's t-test.
